# Supplementary material for: Genome-Wide Analysis of the TCP Transcription Factor Genes in Dendrobium catenatum Lindl
Source: MDPI journal article supplement (doi:10.3390/ijms221910269), 2021-09-24
Supplement: s1 [file s1]

**Table S1.** The accession of *AtTCP* gene.

| Gene           | Accession |
|----------------|-----------|
| <i>AtTCP1</i>  | AT1G67260 |
| <i>AtTCP2</i>  | AT4G18390 |
| <i>AtTCP3</i>  | AT1G53230 |
| <i>AtTCP4</i>  | AT3G15030 |
| <i>AtTCP5</i>  | AT5G60970 |
| <i>AtTCP6</i>  | AT5G41030 |
| <i>AtTCP7</i>  | AT5G23280 |
| <i>AtTCP8</i>  | AT1G58100 |
| <i>AtTCP9</i>  | AT2G45680 |
| <i>AtTCP10</i> | AT2G31070 |
| <i>AtTCP11</i> | AT2G37000 |
| <i>AtTCP12</i> | AT1G68800 |
| <i>AtTCP13</i> | AT3G02150 |
| <i>AtTCP14</i> | AT3G47620 |
| <i>AtTCP15</i> | AT1G69690 |
| <i>AtTCP16</i> | AT3G45150 |
| <i>AtTCP17</i> | AT5G08070 |
| <i>AtTCP18</i> | AT3G18550 |
| <i>AtTCP19</i> | AT5G51910 |
| <i>AtTCP20</i> | AT3G27010 |
| <i>AtTCP21</i> | AT5G08330 |
| <i>AtTCP22</i> | AT1G72010 |
| <i>AtTCP23</i> | AT1G35560 |
| <i>AtTCP24</i> | AT1G30210 |

**Table S2.** The primer sequences of *DcaTCPs* ' CDS.

| <b>Primer Name</b> | <b>Sequence (5' to 3')</b>                  |
|--------------------|---------------------------------------------|
| DcaTCP2-SalI-F     | <i>GCAGCGGCCGTCGACATGGAGGTGAAACAACAAGC</i>  |
| DcaTCP2-EcoRI-R    | <i>GTTGATTCAGAAATTCAGCTTTTTCTCTTTCC</i>     |
| DcaTCP4-SalI-F     | <i>GCAGCGGCCGTCGACATGGCCAAATATTTTCGGAG</i>  |
| DcaTCP4-EcoRI-R    | <i>GTTGATTCAGAAATTCCTAGTAATGAGAAGCAGAGG</i> |
| DcaTCP9-SalI-F     | <i>GCAGCGGCCGTCGACATGGATTTCAGGCCAAGAG</i>   |
| DcaTCP9-EcoRI-R    | <i>GTTGATTCAGAAATTCCTAAGCCGCTTCTTTTACCG</i> |
| DcaTCP14-SalI-F    | <i>GCAGCGGCCGTCGACATGGAGGGAGAAAACATTG</i>   |
| DcaTCP14-EcoRI-R   | <i>GTTGATTCAGAAATTCCTAGGAGTCGCTTGTGCTC</i>  |
